# Supplementary material
Source: PubMed Central journal article supplement (PMC8140501)

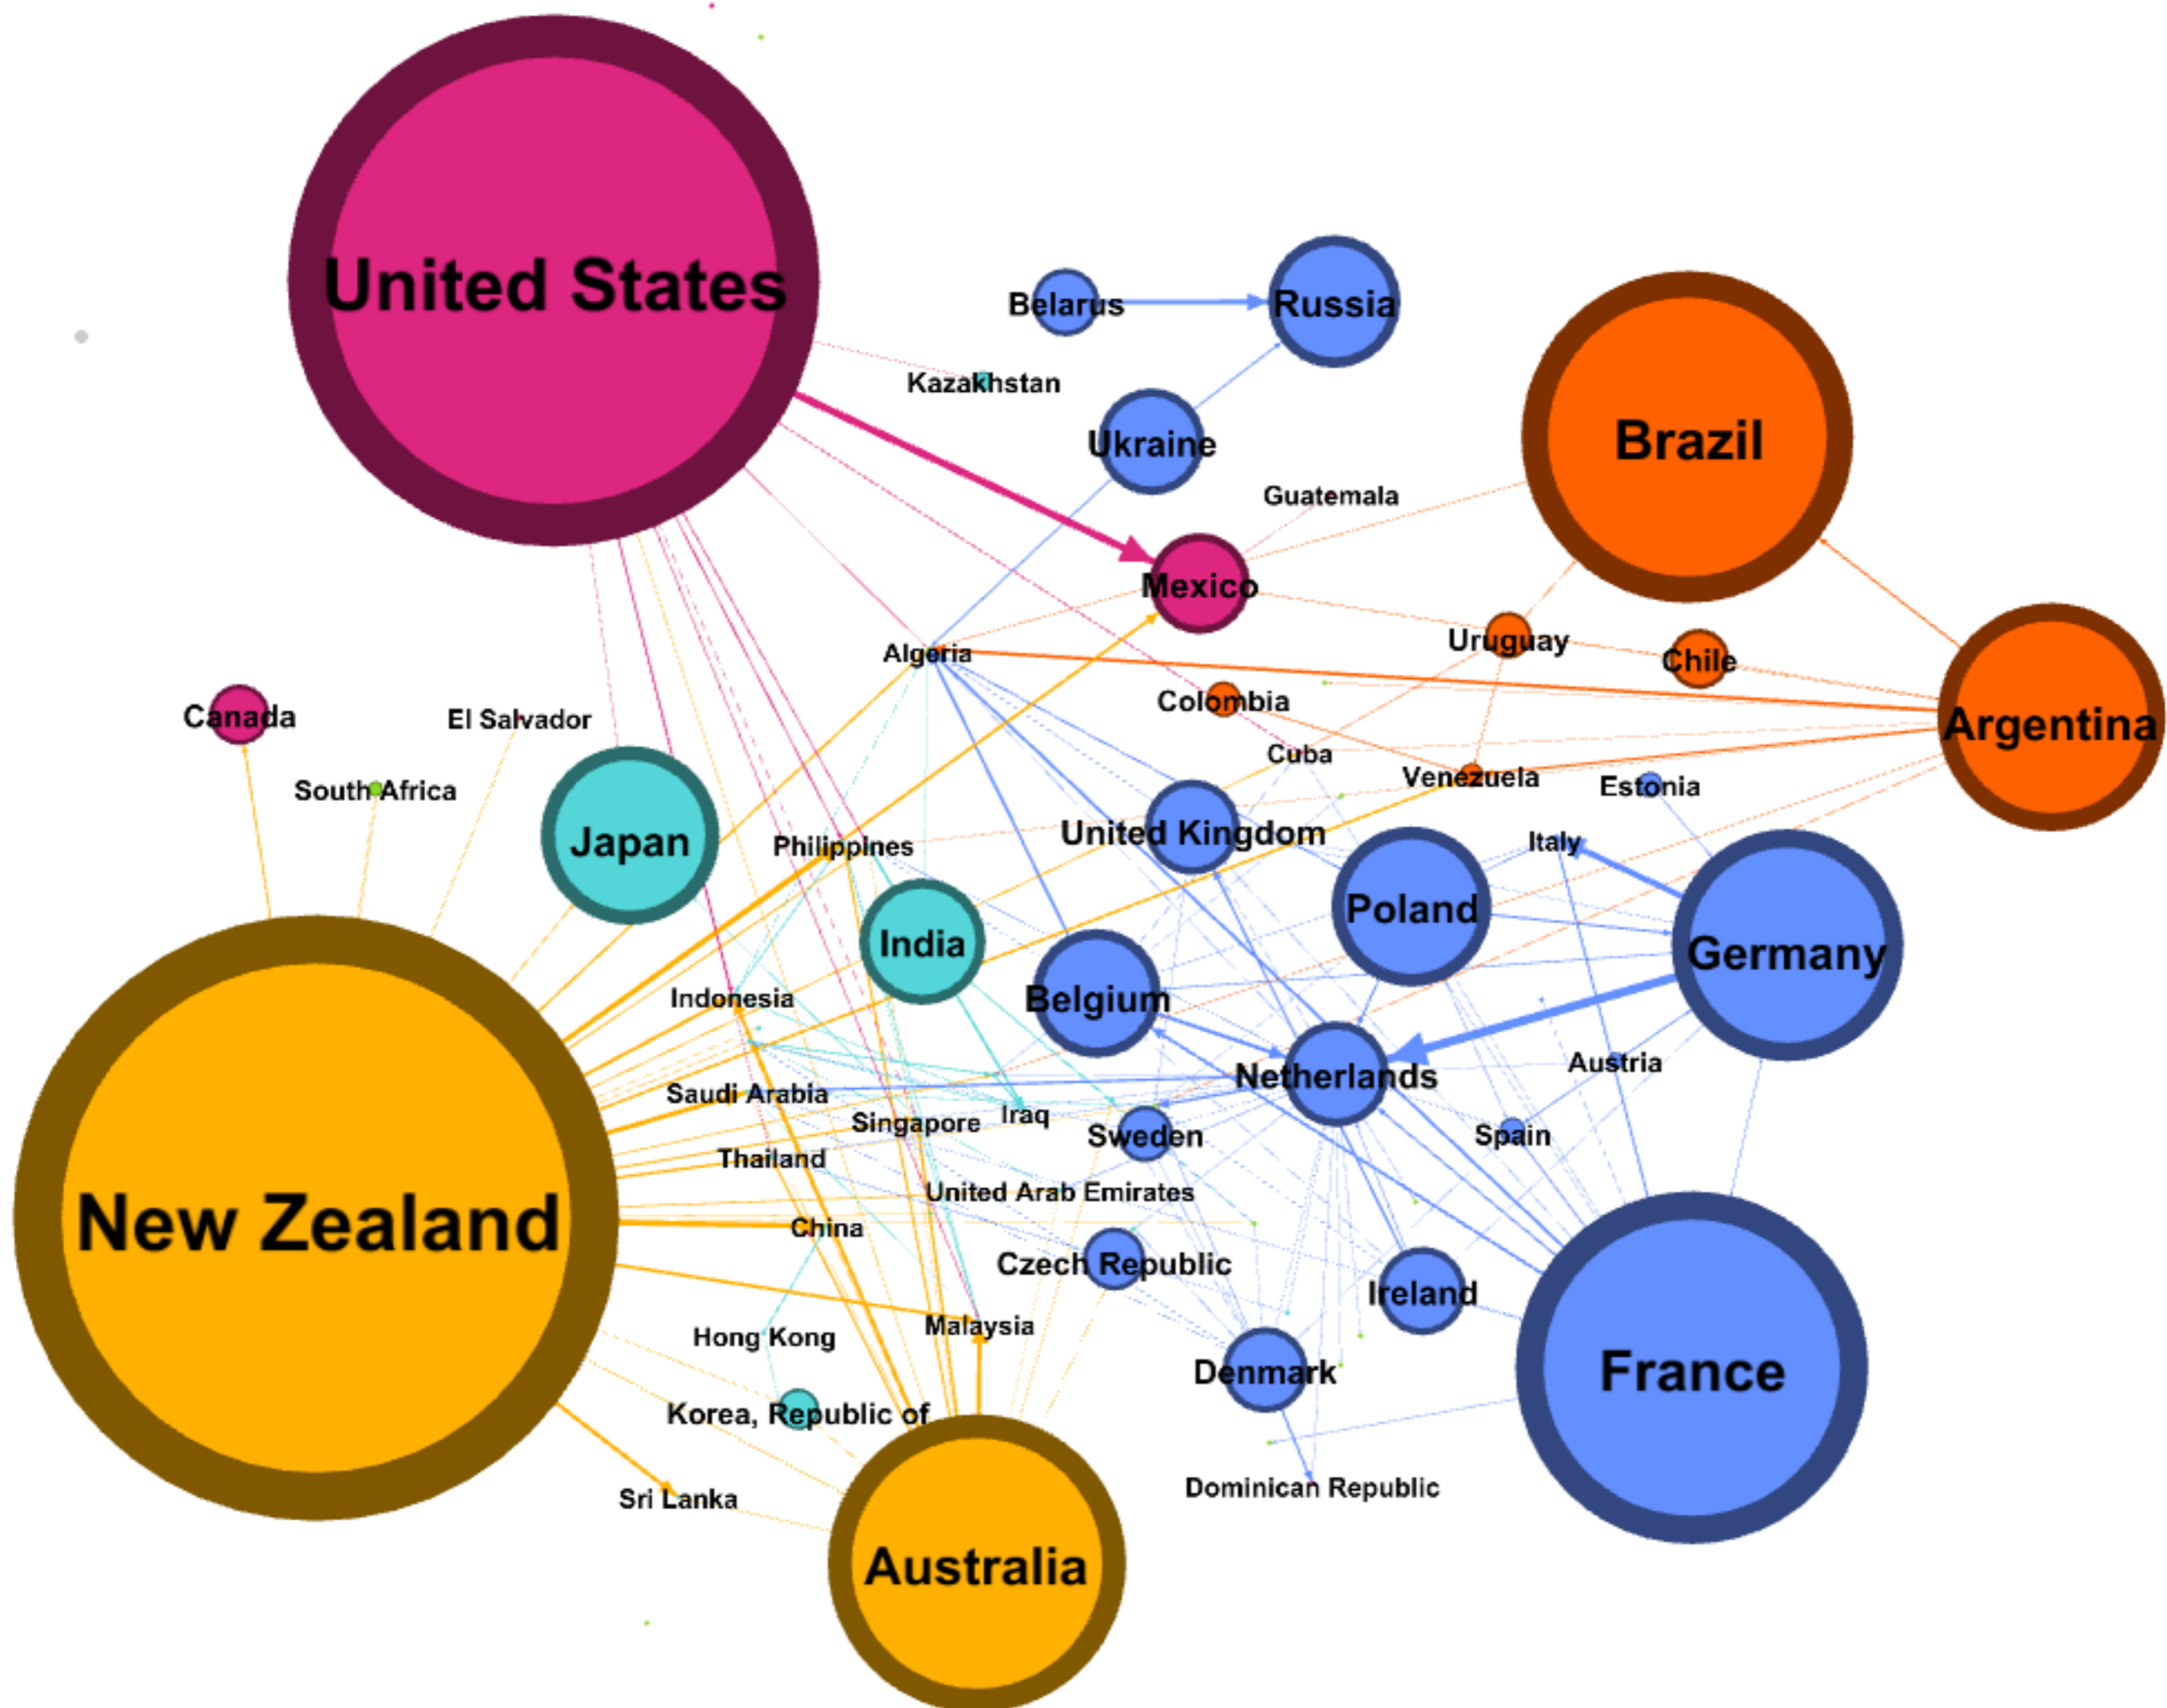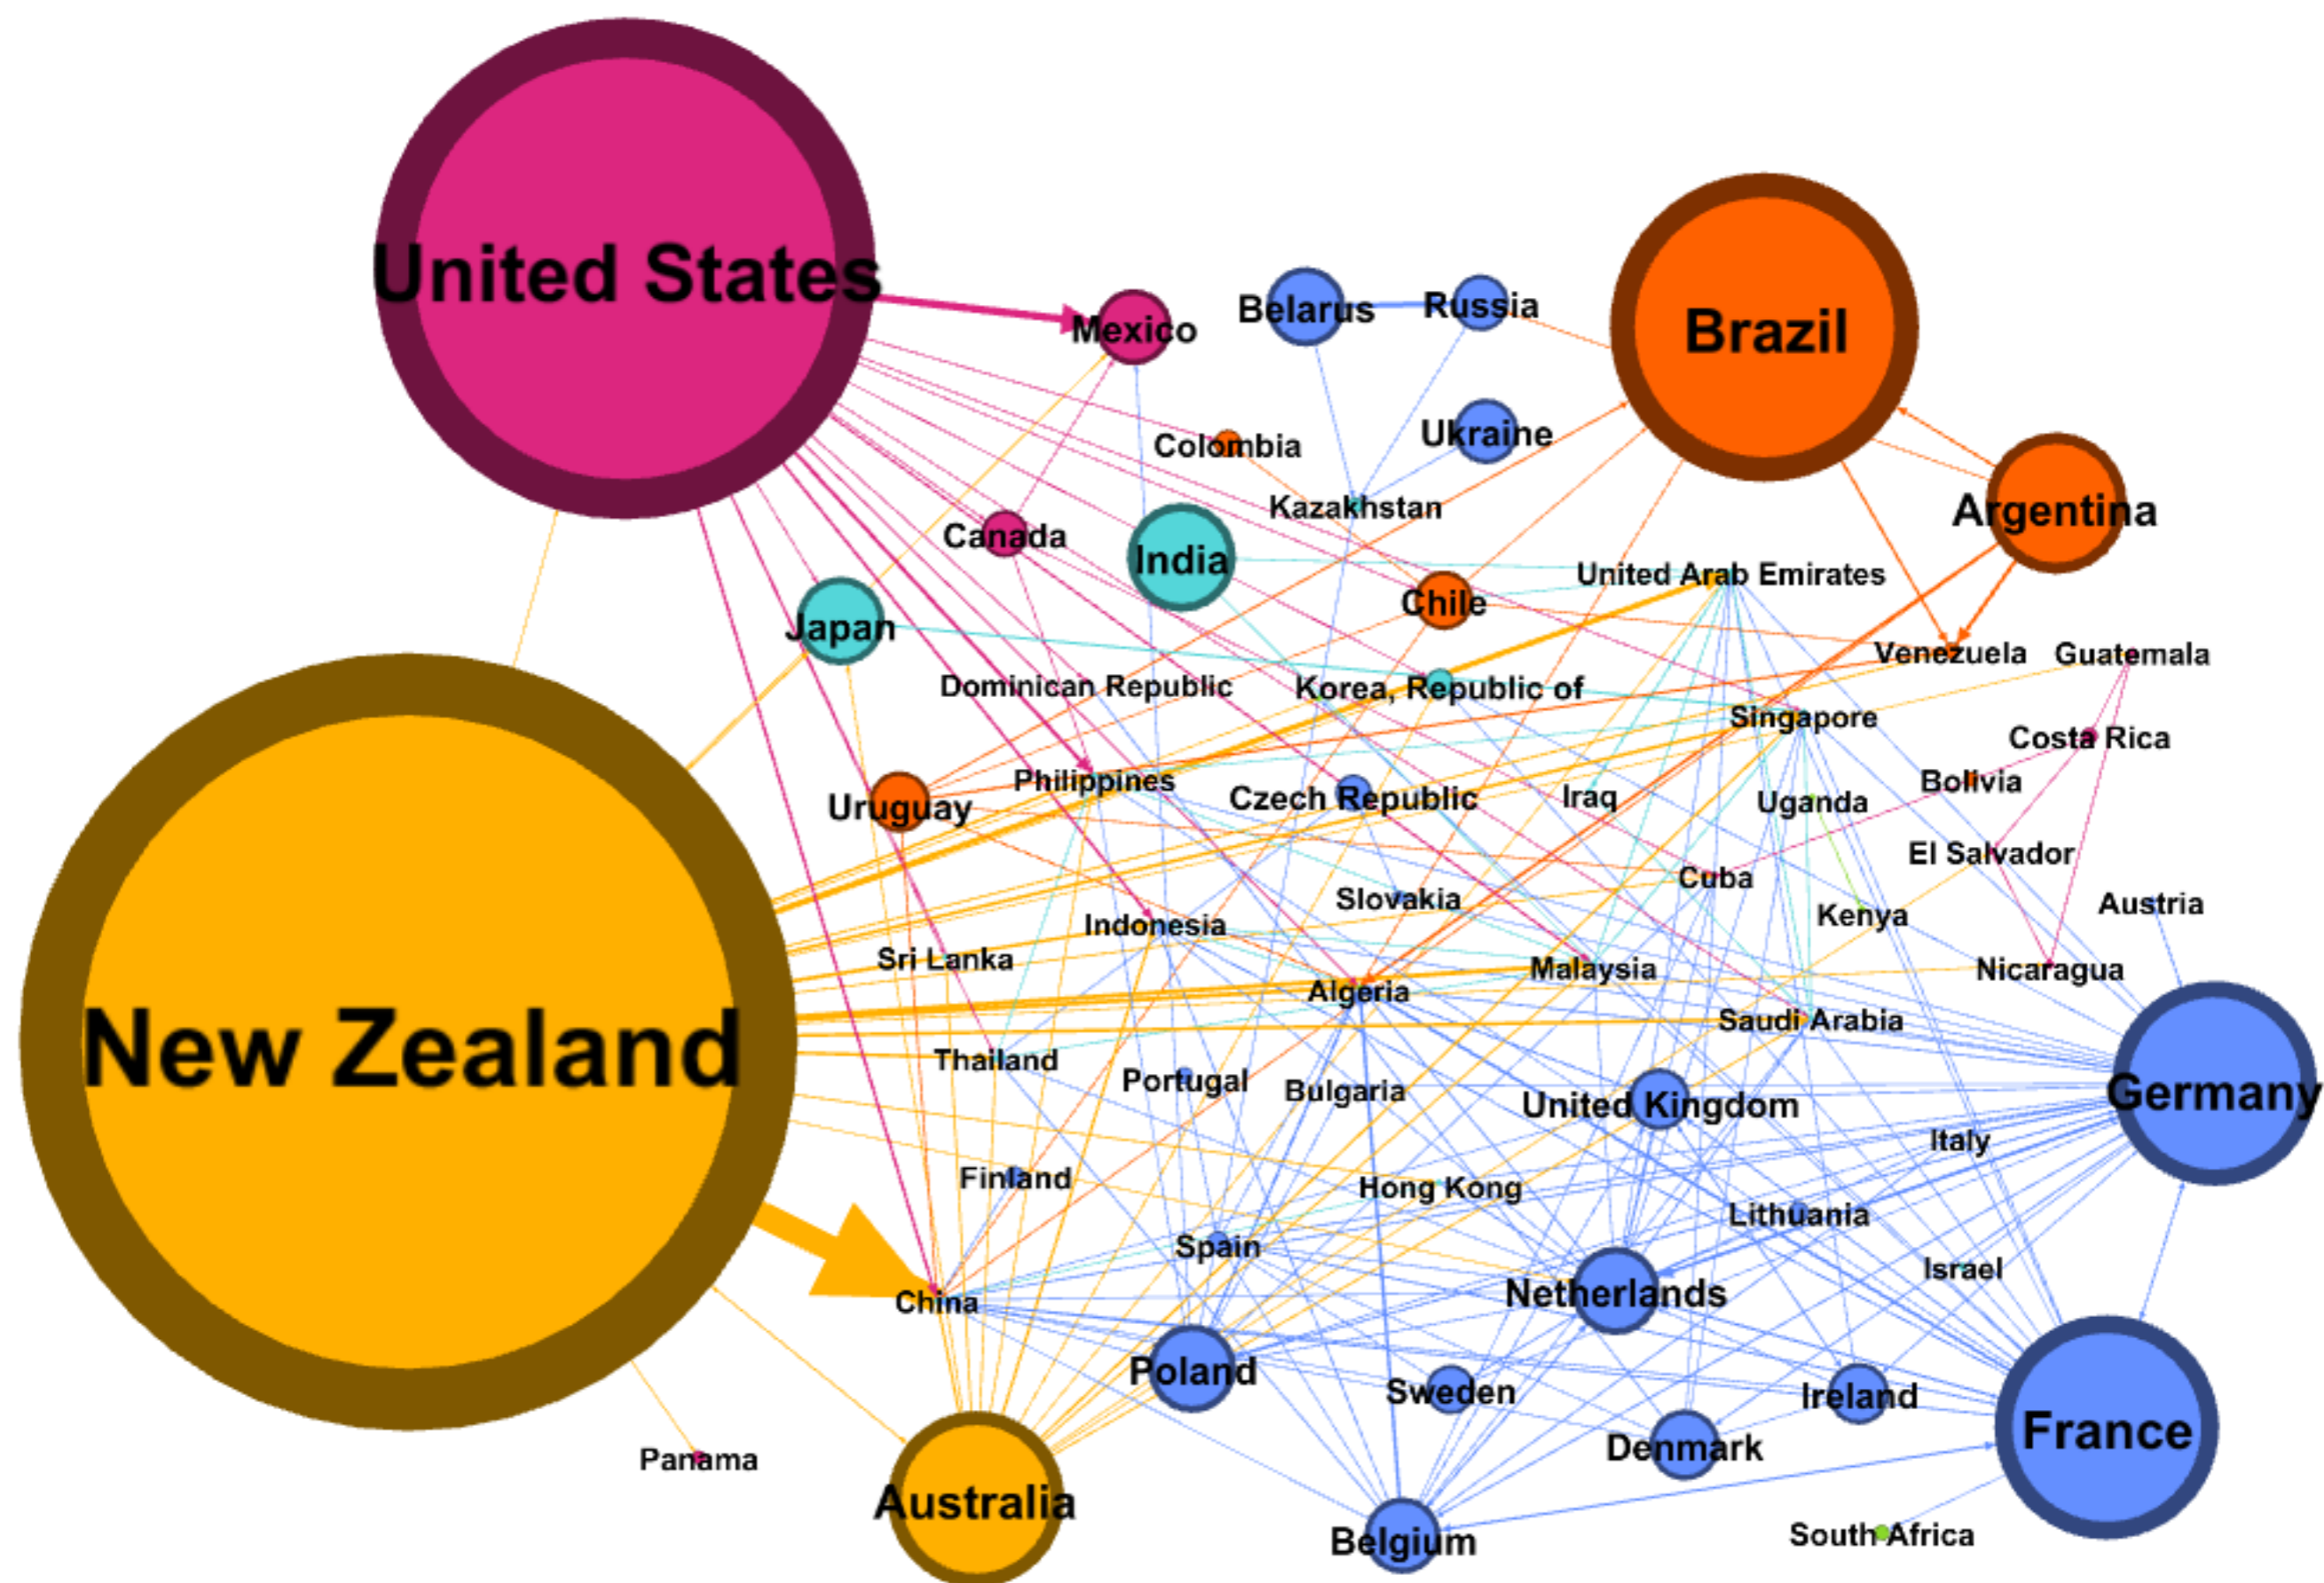

Supplement: 12992_2021_708_MOESM1_ESM.pdf [file 12992_2021_708_MOESM1_ESM.pdf]
